# Supplementary material for: Impaired Cholesterol‐Uptake Capacity of HDL Might Promote Target‐Lesion Revascularization by Inducing Neoatherosclerosis After Stent Implantation
Source: PubMed Central journal article supplement — J Am Heart Assoc. 2019 Apr 18;8(9):e011975. doi: 10.1161/JAHA.119.011975 (PMC6512103; doi:10.1161/jaha.119.011975), 2019-04-18
Supplement: JAH3-8-e011975-s001.pdf [file JAH3-8-e011975-s001.pdf]

# **SUPPLEMENTAL MATERIAL**

**Table S1. Baseline Patient and Lesion Characteristics in a Subgroup of 179 Patients Treated with Drug-eluting Stents.**

| Variable                                                       | NA+<br>(n = 30) | NA-<br>(n = 149) | <i>P</i> |
|----------------------------------------------------------------|-----------------|------------------|----------|
| <b>Clinical characteristics at follow-up</b>                   |                 |                  |          |
| <b>OCT</b>                                                     |                 |                  |          |
| Age (years)                                                    | 70.7 ± 9.56     | 69.6 ± 9.77      | 0.567    |
| Male                                                           | 24 (80.0)       | 123 (82.6)       | 0.739    |
| Duration between stent implantation and follow-up OCT (months) | 50.3 ± 36.0     | 27.8 ± 26.2      | < 0.001  |
| Diabetes mellitus                                              | 18 (60.0)       | 68 (45.6)        | 0.151    |
| Hypertension                                                   | 22 (73.3)       | 119 (79.9)       | 0.425    |
| Dyslipidemia                                                   | 29 (96.7)       | 138 (92.6)       | 0.369    |
| Smoking                                                        | 16 (53.3)       | 80 (53.7)        | 0.971    |
| Hemodialysis                                                   | 1 (3.3)         | 4 (2.7)          | 0.605    |
| Angina status                                                  |                 |                  | 0.611    |
| Stable angina pectoris                                         | 20 (66.7)       | 92 (61.7)        |          |
| Unstable angina pectoris or acute coronary syndrome            | 10 (33.3)       | 57 (38.3)        |          |
| <b>Medication at follow-up OCT</b>                             |                 |                  |          |
| Dual anti-platelet therapy                                     | 18 (60.0)       | 109 (73.2)       | 0.148    |
| Statin                                                         | 29 (96.7)       | 138 (92.6)       | 0.369    |
| ACE-I and/or ARB                                               | 23 (76.7)       | 95 (63.8)        | 0.174    |
| Beta-blocker                                                   | 18 (60.0)       | 87 (58.4)        | 0.870    |
| EPA                                                            | 5 (16.7)        | 13 (8.7)         | 0.160    |
| <b>Laboratory data at follow-up OCT</b>                        |                 |                  |          |
| hs CRP (mg/dL)                                                 | 0.16 ± 0.14     | 0.07 ± 0.10      | < 0.001  |
| Creatinine (mg/dL)                                             | 1.14 ± 1.03     | 0.90 ± 0.19      | 0.056    |
| HbA1c (%)                                                      | 6.71 ± 1.30     | 6.22 ± 0.83      | 0.057    |
| Total-cholesterol (mg/dL)                                      | 144.2 ± 29.6    | 148.7 ± 34.4     | 0.505    |
| HDL-C (mg/dL)                                                  | 44.4 ± 10.7     | 47.7 ± 13.2      | 0.213    |
| LDL-C (mg/dL)                                                  | 93.1 ± 20.9     | 83.8 ± 25.9      | 0.065    |

|                                                            |              |              |         |
|------------------------------------------------------------|--------------|--------------|---------|
| Triglyceride (mg/dL)                                       | 128.2 ± 69.6 | 135.2 ± 72.2 | 0.628   |
| CUC (A.U.)                                                 | 18.4 ± 4.16  | 24.5 ± 6.37  | < 0.001 |
| <b>Lesion and stent characteristics at index procedure</b> |              |              |         |
| Lesion location                                            |              |              | 0.170   |
| Left anterior descending artery                            | 15 (50.0)    | 78 (52.3)    |         |
| Left circumflex artery                                     | 2 (6.7)      | 27 (18.1)    |         |
| Right coronary artery                                      | 13 (43.3)    | 44 (29.6)    |         |
| Type of stent                                              |              |              | 0.141   |
| Sirolimus-eluting stent                                    | 6 (20.0)     | 13 (8.7)     |         |
| Paclitaxel-eluting stent                                   | 3 (10.0)     | 7 (4.7)      |         |
| Biolimus-eluting stent                                     | 4 (13.3)     | 28 (18.8)    |         |
| Everolimus-eluting stent                                   | 17 (56.7)    | 101 (67.8)   |         |
| Mean stent size (mm)                                       | 3.11 ± 0.31  | 3.07 ± 0.38  | 0.577   |
| Total stent length (mm)                                    | 24.2 ± 8.86  | 23.9 ± 7.02  | 0.872   |

NA: neoatherosclerosis; OCT: optical coherence tomography; ACE-I: angiotensin converting enzyme-inhibitor; ARB: angiotensin II receptor blocker; EPA: eicosapentaenoic acid; hs CRP: high-sensitivity C-reactive protein; HDL-C: high-density lipoprotein-cholesterol; LDL-C: low-density lipoprotein-cholesterol; CUC: cholesterol-uptake capacity.

Values are presented as means ± SD or absolute numbers (%).

**Table S2. OCT Findings in a Subgroup of 179 Patients Treated with Drug-eluting Stents.**

| Variable                              | NA+<br>(n = 30) | NA-<br>(n = 149) | <i>P</i> |
|---------------------------------------|-----------------|------------------|----------|
| Minimum lumen area (mm <sup>2</sup> ) | 4.32 ± 1.75     | 4.65 ± 1.76      | 0.411    |
| Minimum stent area (mm <sup>2</sup> ) | 6.20 ± 1.82     | 5.87 ± 1.92      | 0.422    |
| Incomplete stent apposition           | 6 (20.0)        | 22 (14.8)        | 0.316    |
| Thin-cap fibroatheroma                | 1 (3.3)         | 0 (0.0)          | 0.168    |
| Macrophage accumulation               | 30 (100)        | 8 (5.4)          | < 0.001  |
| Thrombus                              | 1 (3.3)         | 2 (1.3)          | 0.425    |
| Peri-strut low-intensity area         | 2 (6.7)         | 25 (16.8)        | 0.125    |
| Vasa vasorum                          | 4 (13.3)        | 11 (7.4)         | 0.228    |

NA: neoatherosclerosis.

Values are presented as means ± SD or absolute numbers (%).

**Table S3. Univariate and Multivariate Logistic Regression Analysis of Clinical Parameters for Neoatherosclerosis in a Subgroup of 179 Patients Treated with Drug-eluting Stents.**

| Variable                                              | Univariate |             |          | Multivariate |             |          |
|-------------------------------------------------------|------------|-------------|----------|--------------|-------------|----------|
|                                                       | OR         | 95% CI      | <i>P</i> | OR           | 95% CI      | <i>P</i> |
| Age                                                   | 1.012      | 0.971–1.055 | 0.565    | 1.014        | 0.959–1.071 | 0.632    |
| Male                                                  | 0.846      | 0.314–2.275 | 0.740    | 0.464        | 0.134–1.604 | 0.225    |
| Duration between stent implantation and follow-up OCT | 1.022      | 1.010–1.034 | < 0.001  | 1.033        | 1.017–1.050 | < 0.001  |
| hs CRP                                                | 1.062      | 1.023–1.102 | < 0.001  | 1.046        | 1.010–1.083 | 0.012    |
| LDL-C                                                 | 1.013      | 0.999–1.029 | 0.076    | 1.020        | 0.999–1.041 | 0.067    |
| CUC                                                   | 0.820      | 0.749–0.896 | < 0.001  | 0.781        | 0.699–0.873 | < 0.001  |

OCT: optical coherence tomography; hs CRP: high-sensitivity C-reactive protein; LDL-C: low-density lipoprotein-cholesterol; CUC: cholesterol-uptake capacity; OR: odds ratio; CI: confidence interval.

**Table S4. Univariate and Multivariate Logistic Regression Analysis of Patient Characteristics for Target-Lesion Revascularization in a Subgroup of 179 Patients Treated with Drug-eluting Stents.**

| Variable                                              | Univariate |             |          | Multivariate |             |          |
|-------------------------------------------------------|------------|-------------|----------|--------------|-------------|----------|
|                                                       | OR         | 95% CI      | <i>P</i> | OR           | 95% CI      | <i>P</i> |
| Age                                                   | 0.981      | 0.935–1.029 | 0.436    | 0.959        | 0.907–1.014 | 0.139    |
| Male                                                  | 1.098      | 0.298–4.043 | 0.888    | 0.879        | 0.208–3.709 | 0.861    |
| Duration between stent implantation and follow-up OCT | 1.022      | 1.008–1.035 | 0.002    | 1.026        | 1.011–1.041 | 0.001    |
| CUC                                                   | 0.881      | 0.803–0.966 | 0.007    | 0.854        | 0.769–0.947 | 0.003    |
| Everolimus-eluting stent                              | 0.295      | 0.108–0.805 | 0.017    | 0.592        | 0.176–1.986 | 0.396    |

OCT: optical coherence tomography; CUC: cholesterol-uptake capacity; OR: odds ratio; CI: confidence interval.

**Table S5. Univariate and Multivariate Logistic Regression Analysis of OCT Findings for Target-Lesion Revascularization in a Subgroup of 179 Patients Treated with Drug-eluting Stents.**

| Variable                      | Univariate |             |          | Multivariate |             |          |
|-------------------------------|------------|-------------|----------|--------------|-------------|----------|
|                               | OR         | 95% CI      | <i>P</i> | OR           | 95% CI      | <i>P</i> |
| Minimum lumen area            | 0.695      | 0.446–1.083 | 0.108    | 0.596        | 0.305–1.164 | 0.129    |
| Minimum stent area            | 0.974      | 0.735–1.292 | 0.857    | 1.288        | 0.677–2.450 | 0.441    |
| Incomplete stent apposition   | 0.649      | 0.141–2.994 | 0.579    | 1.762        | 0.229–13.57 | 0.587    |
| Neoatherosclerosis            | 22.02      | 6.992–69.37 | < 0.001  | 27.05        | 6.434–113.7 | < 0.001  |
| Peri-strut low-intensity area | 0.680      | 0.147–3.142 | 0.621    | 0.489        | 0.037–6.496 | 0.587    |
| Vasa vasorum                  | 2.483      | 0.630–9.793 | 0.194    | 2.247        | 0.226–22.31 | 0.489    |

OR: odds ratio; CI: confidence interval.

**Table S6. Baseline Patient and Lesion Characteristics in a Subgroup of 97 Patients Whose Follow-up Period was Between 1 year and 5 Years After Stent Implantation.**

| Variable                                                       | NA+<br>(n = 16) | NA-<br>(n = 81) | <i>P</i> |
|----------------------------------------------------------------|-----------------|-----------------|----------|
| <b>Clinical characteristics at follow-up</b>                   |                 |                 |          |
| <b>OCT</b>                                                     |                 |                 |          |
| Age (years)                                                    | 70.5 ± 9.70     | 69.5 ± 9.09     | 0.701    |
| Male                                                           | 14 (87.5)       | 65 (80.2)       | 0.390    |
| Duration between stent implantation and follow-up OCT (months) | 27.1 ± 10.9     | 27.0 ± 11.8     | 0.972    |
| Diabetes mellitus                                              | 9 (56.3)        | 45 (55.6)       | 0.959    |
| Hypertension                                                   | 12 (75.0)       | 67 (82.7)       | 0.339    |
| Dyslipidemia                                                   | 16 (100)        | 74 (91.4)       | 0.271    |
| Smoking                                                        | 10 (62.5)       | 43 (53.1)       | 0.489    |
| Hemodialysis                                                   | 1 (6.3)         | 0 (0)           | 0.165    |
| Angina status                                                  |                 |                 | 0.226    |
| Stable angina pectoris                                         | 13 (81.2)       | 55 (67.9)       |          |
| Unstable angina pectoris or acute coronary syndrome            | 3 (18.8)        | 26 (32.1)       |          |
| <b>Medication at follow-up OCT</b>                             |                 |                 |          |
| Dual anti-platelet therapy                                     | 9 (56.3)        | 52 (64.2)       | 0.548    |
| Statin                                                         | 16 (100)        | 74 (91.4)       | 0.271    |
| ACE-I and/or ARB                                               | 13 (81.3)       | 53 (65.4)       | 0.215    |
| Beta-blocker                                                   | 10 (62.5)       | 40 (49.4)       | 0.337    |
| EPA                                                            | 1 (6.3)         | 6 (7.4)         | 0.675    |
| <b>Laboratory data at follow-up OCT</b>                        |                 |                 |          |
| hs CRP (mg/dL)                                                 | 0.16 ± 0.14     | 0.07 ± 0.05     | < 0.001  |
| Creatinine (mg/dL)                                             | 1.31 ± 1.39     | 0.92 ± 0.21     | 0.286    |
| HbA1c (%)                                                      | 6.49 ± 1.03     | 6.34 ± 0.87     | 0.534    |
| Total-cholesterol (mg/dL)                                      | 139.4 ± 18.0    | 148.7 ± 31.4    | 0.259    |
| HDL-C (mg/dL)                                                  | 42.9 ± 9.45     | 48.4 ± 13.9     | 0.134    |
| LDL-C (mg/dL)                                                  | 87.5 ± 19.5     | 83.7 ± 22.5     | 0.534    |



|                                                            |              |              |         |
|------------------------------------------------------------|--------------|--------------|---------|
| Triglyceride (mg/dL)                                       | 122.9 ± 59.0 | 142.1 ± 80.3 | 0.367   |
| CUC (A.U.)                                                 | 16.9 ± 3.31  | 24.8 ± 6.58  | < 0.001 |
| <b>Lesion and stent characteristics at index procedure</b> |              |              |         |
| Lesion location                                            |              |              | 0.031   |
| Left anterior descending artery                            | 5 (31.2)     | 47 (58.0)    |         |
| Left circumflex artery                                     | 1 (6.3)      | 11 (13.6)    |         |
| Right coronary artery                                      | 10 (62.5)    | 23 (28.4)    |         |
| Type of stent                                              |              |              | 0.782   |
| Bare-metal stent                                           | 0 (0)        | 2 (2.5)      |         |
| Sirolimus-eluting stent                                    | 0 (0)        | 3 (3.7)      |         |
| Paclitaxel-eluting stent                                   | 1 (6.3)      | 2 (2.5)      |         |
| Biolimus-eluting stent                                     | 3 (18.7)     | 20 (24.7)    |         |
| Everolimus-eluting stent                                   | 12 (75.0)    | 54 (66.6)    |         |
| Mean stent size (mm)                                       | 3.15 ± 0.28  | 3.03 ± 0.38  | 0.163   |
| Total stent length (mm)                                    | 23.7 ± 10.2  | 24.2 ± 7.55  | 0.582   |

NA: neoatherosclerosis; OCT: optical coherence tomography; ACE-I: angiotensin converting enzyme-inhibitor; ARB: angiotensin II receptor blocker; EPA: eicosapentaenoic acid; hs CRP: high-sensitivity C-reactive protein; HDL-C: high-density lipoprotein-cholesterol; LDL-C: low-density lipoprotein-cholesterol; CUC: cholesterol-uptake capacity.

Values are presented as means ± SD or absolute numbers (%).

**Table S7. OCT Findings in a Subgroup of 97 Patients whose Follow-up Period was Between 1 year and 5 years after Stent Implantation.**

| Variable                              | NA+<br>(n = 16) | NA-<br>(n = 81) | <i>P</i> |
|---------------------------------------|-----------------|-----------------|----------|
| Minimum lumen area (mm <sup>2</sup> ) | 4.76 ± 1.81     | 4.60 ± 1.73     | 0.761    |
| Minimum stent area (mm <sup>2</sup> ) | 6.37 ± 1.68     | 5.71 ± 2.06     | 0.159    |
| Incomplete stent apposition           | 4 (25.0)        | 13 (16.0)       | 0.295    |
| Macrophage accumulation               | 16 (100)        | 3 (3.7)         | < 0.001  |
| Thrombus                              | 1 (6.3)         | 1 (1.2)         | 0.304    |
| Peri-strut low-intensity area         | 2 (12.5)        | 11 (13.6)       | 0.635    |
| Vasa vasorum                          | 3 (18.8)        | 7 (8.6)         | 0.212    |

NA: neoatherosclerosis.

Values are presented as means ± SD or absolute numbers (%).

**Table S8. Univariate and Multivariate Logistic Regression Analysis of Clinical Parameters for Neoatherosclerosis in a Subgroup of 97 Patients Whose Follow-up Period was Between 1 Year and 5 Years After Stent Implantation.**

| Variable                                              | Univariate |             |          | Multivariate |             |          |
|-------------------------------------------------------|------------|-------------|----------|--------------|-------------|----------|
|                                                       | OR         | 95% CI      | <i>P</i> | OR           | 95% CI      | <i>P</i> |
| Age                                                   | 1.012      | 0.953–1.074 | 0.697    | 1.089        | 0.971–1.222 | 0.145    |
| Male                                                  | 1.723      | 0.355–8.360 | 0.500    | 1.032        | 0.121–8.826 | 0.977    |
| Duration between stent implantation and follow-up OCT | 1.001      | 0.956–1.048 | 0.971    | 1.012        | 0.878–1.167 | 0.867    |
| hs CRP                                                | 1.136      | 1.048–1.232 | 0.002    | 1.163        | 1.038–1.303 | 0.009    |
| LDL-C                                                 | 1.008      | 0.983–1.033 | 0.529    | 1.017        | 0.981–1.054 | 0.364    |
| CUC                                                   | 0.745      | 0.639–0.870 | < 0.001  | 0.742        | 0.631–0.873 | < 0.001  |
| Right coronary artery                                 | 1.200      | 0.394–3.651 | 0.748    | 3.544        | 0.074–169.7 | 0.521    |

OCT: optical coherence tomography; hs CRP: high-sensitivity C-reactive protein; LDL-C: low-density lipoprotein-cholesterol; CUC: cholesterol-uptake capacity; OR: odds ratio; CI: confidence interval.

**Table S9. Univariate and Multivariate Logistic Regression Analysis of Patient Characteristics for Target-Lesion Revascularization in a Subgroup of 97 Patients Whose Follow-up Period was Between 1 Year and 5 Years After Stent Implantation.**

| Variable                                          | Univariate |             |          | Multivariate |             |          |
|---------------------------------------------------|------------|-------------|----------|--------------|-------------|----------|
|                                                   | OR         | 95% CI      | <i>P</i> | OR           | 95% CI      | <i>P</i> |
| Age                                               | 0.945      | 0.874–1.022 | 0.159    | 0.955        | 0.877–1.040 | 0.293    |
| Male                                              | 0.658      | 0.121–3.561 | 0.627    | 0.566        | 0.083–3.880 | 0.562    |
| Duration between stent implantation and follow-up | 0.993      | 0.931–1.059 | 0.841    | 1.014        | 0.949–1.083 | 0.685    |
| OCT                                               |            |             |          |              |             |          |
| CUC                                               | 0.832      | 0.716–0.968 | 0.017    | 0.832        | 0.716–0.968 | 0.017    |
| Everolimus-eluting stent                          | 0.435      | 0.101–1.871 | 0.264    | 2.233        | 0.354–14.10 | 0.339    |

OCT: optical coherence tomography; CUC: cholesterol-uptake capacity; OR: odds ratio; CI: confidence interval.

**Table S10. Univariate and Multivariate Logistic Regression Analysis of OCT Findings for Target-Lesion Revascularization in a Subgroup of 97 Patients Whose Follow-up Period was Between 1 Year and 5 Years After Stent Implantation.**

| Variable                      | Univariate |             |          | Multivariate |             |          |
|-------------------------------|------------|-------------|----------|--------------|-------------|----------|
|                               | OR         | 95% CI      | <i>P</i> | OR           | 95% CI      | <i>P</i> |
| Minimum lumen area            | 0.851      | 0.532–1.360 | 0.499    | 1.061        | 0.378–2.976 | 0.910    |
| Minimum stent area            | 0.874      | 0.574–1.329 | 0.528    | 0.893        | 0.325–2.449 | 0.826    |
| Neoatherosclerosis            | 23.70      | 4.201–133.7 | < 0.001  | 21.90        | 3.877–123.7 | < 0.001  |
| Peri-strut low-intensity area | 4.740      | 0.981–22.90 | 0.053    | 2.482        | 0.386–15.98 | 0.399    |

OR: odds ratio; CI: confidence interval.
